# Supplementary material for: A recent burst of gene duplications in Triticeae
Source: PubMed Central journal article supplement — Plant Commun. 2021 Dec 11;3(2):100268. doi: 10.1016/j.xplc.2021.100268 (PMC9073319; doi:10.1016/j.xplc.2021.100268), 2021-12-11
Supplement: mmc1.pdf [file mmc1.pdf]

**Plant Communications, Volume 3**

**Supplemental information**

**A recent burst of gene duplications in Triticeae**

**Xiaoliang Wang, Xueqing Yan, Yiheng Hu, Liuyu Qin, Daowen Wang, Jizeng Jia, and Yuannian Jiao**

1 **Supplemental Information**

2  
3 **A recent burst of gene duplications in Triticeae**

4  
5 Xiaoliang Wang<sup>1,2#</sup>, Xueqing Yan<sup>1,2#</sup>, Yiheng Hu<sup>1,2#</sup>, Liuyu Qin<sup>1,2</sup>, Daowen Wang<sup>3\*</sup>, Jizeng Jia<sup>3,4\*</sup>,  
6 Yuannian Jiao<sup>1,2\*</sup>

7  
8 <sup>1</sup>State Key Laboratory of Systematic and Evolutionary Botany, Institute of Botany, Chinese  
9 Academy of Sciences, Beijing 100093, China.

10 <sup>2</sup>University of Chinese Academy of Sciences, Beijing 100049, China.

11 <sup>3</sup>College of Agronomy, Collaborative Innovation Center of Henan Grain Crops, Henan  
12 Agricultural University, Zhengzhou, Henan 450046, China.

13 <sup>4</sup>Institute of Crop Sciences, Chinese Academy of Agricultural Sciences, Beijing 100081, China.

14  
15  
16  
17  
18  
19  
20  
21  
22  
23  
24  
25  
26  
27  
28  
29  
30  
31  
32  
33

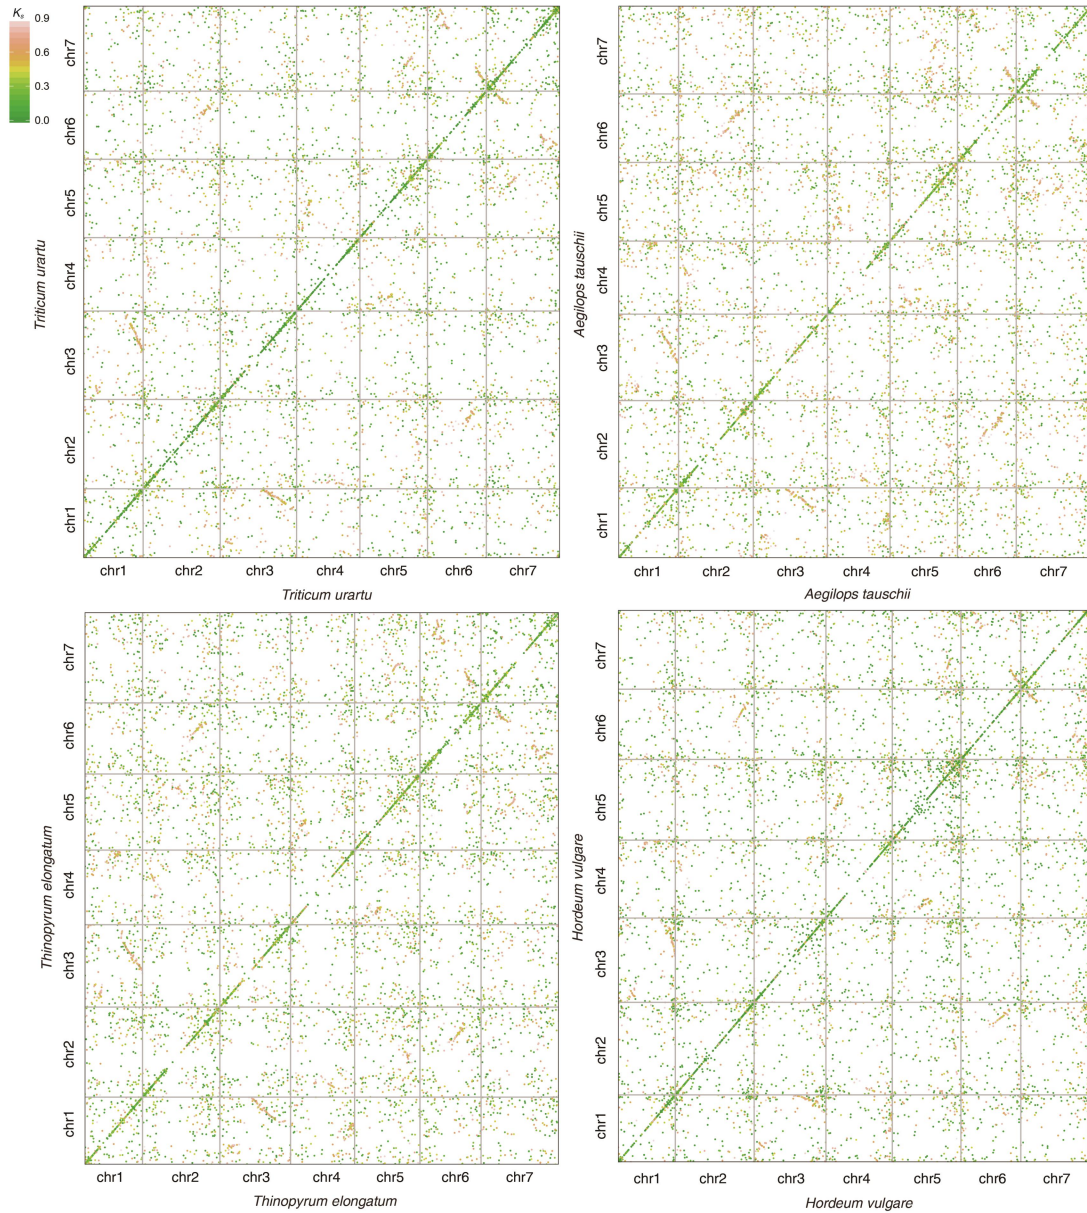

34

35 **Supplementary Figure 1. Dot plots of genomic or subgenomic self-comparisons.**

36 Intra-genomic dot plots of gene pairs retrieved from all against all best reciprocal hits  
 37 in *T. urartu*, *Ae. tauschii*, *Th. elongatum* and *H. vulgare* genome respectively.  $K_s$   
 38 value of each gene pair was shown by plotting different colors.

39

40

41

42

43

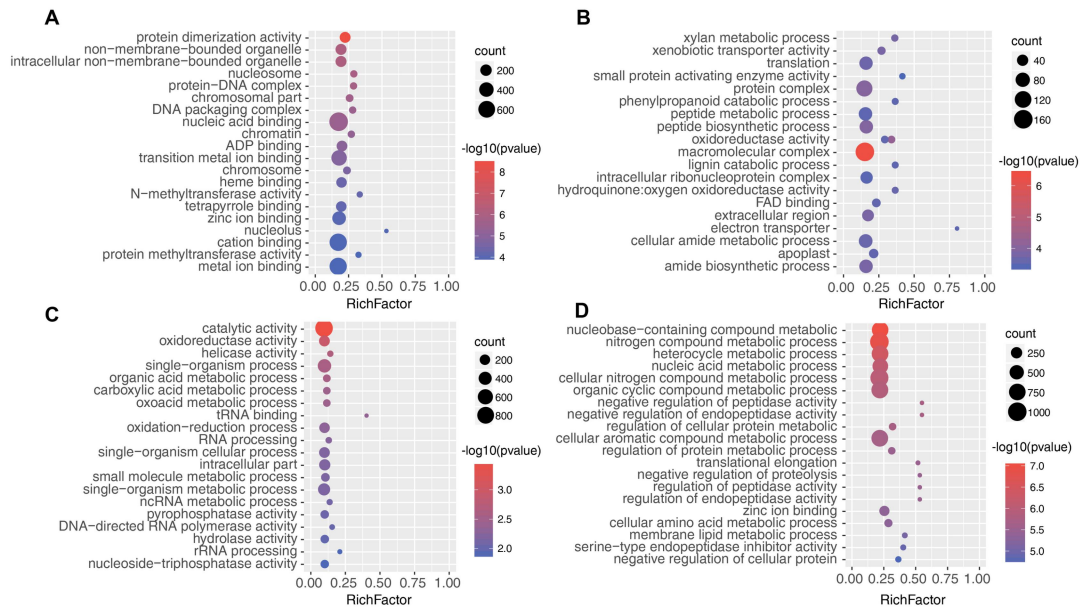

44

45 **Supplementary Figure 2. Significantly enriched GO terms for the recently**  
 46 **duplicated genes in (A) *T. urartu*, (B) *Ae. tauschii*, (C) *Th. elongatum* and (D) *H.***  
 47 ***vulgare* genome. The results are sorted according to significance, of which GO term**  
 48 **of protein dimerization activity, xylan metabolic process, catalytic activity, and**  
 49 **nucleobase-containing compound metabolic are the most significant respectively.**

50

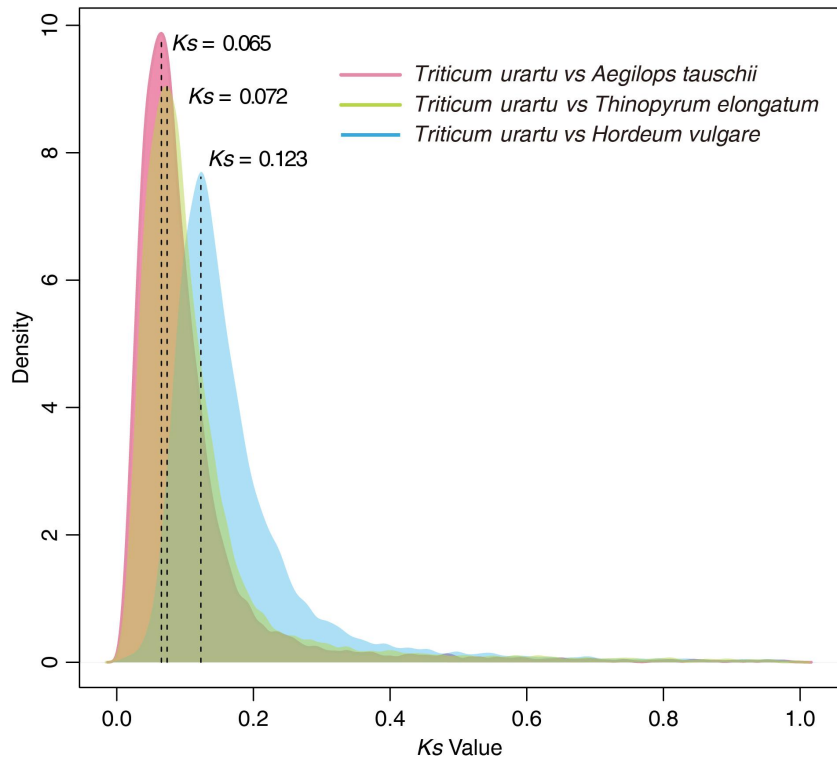

51

52 **Supplementary Figure 3. Density plot of  $K_s$  values of the best reciprocal hits**  
 53 **comparing *T. urartu* to *Ae. tauschii*, *Th. elongatum* and *H. vulgare* respectively.**

54 The three  $K_s$  values correspond to the differentiation of the Triticeae with the  $K_s$   
 55 around 0.123, the differentiation of *Th. elongatum* and *Triticum* with the  $K_s$  around  
 56 0.072, and the differentiation of *Triticum* with the  $K_s$  around 0.065 respectively.

57

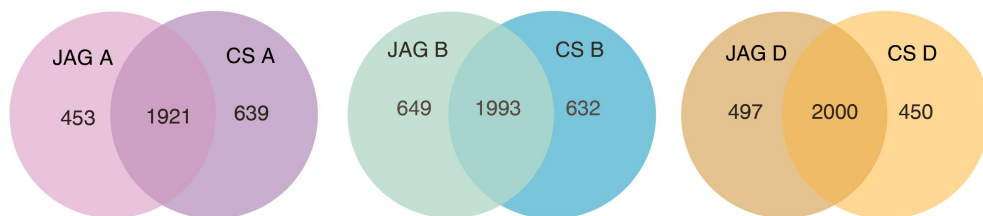

58

59 **Supplementary Figure 4. Venn diagrams show commonly-retained and**  
 60 **specific-retained recent duplicates in wheat cultivars of JAG and CS.**

61

62

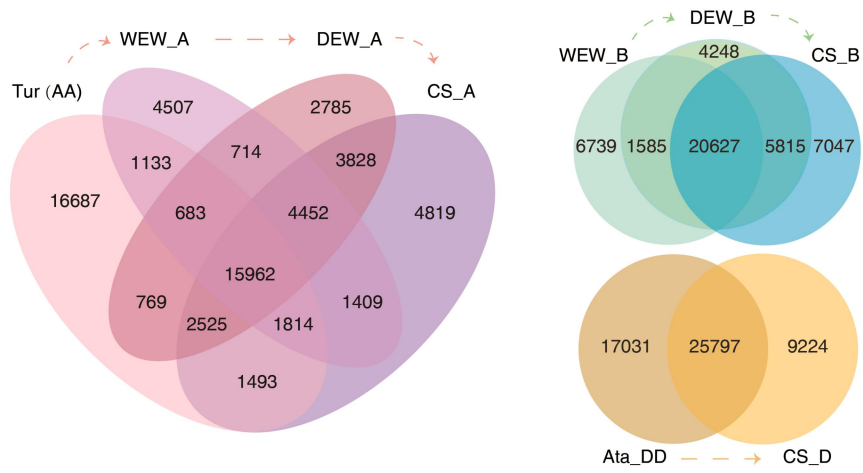

63

64 **Supplementary Figure 5. Venn diagram shows the numbers of orthologous in CS**  
 65 **subgenomes and their progenitor genomes.**

66

67

68

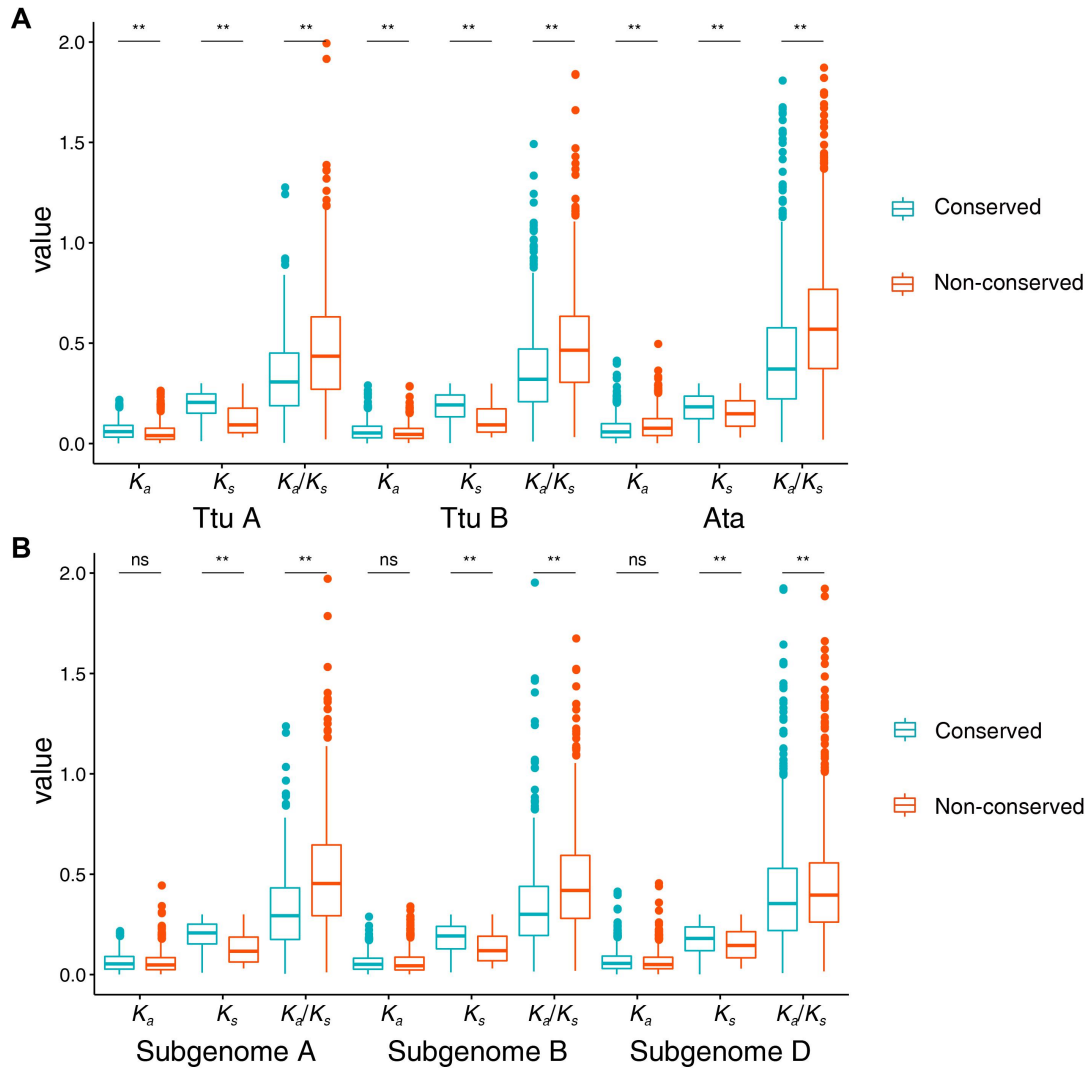

69

70 **Supplementary Figure 6. Sequence divergence and selection analyses of the**  
 71 **orthologous gene pairs between CS and its progenitor species. (A)** The  $K_a$ ,  $K_s$ , and  
 72  $K_d/K_s$  analyses of recent duplicates in progenitor genomes. Conserved gene pairs refer  
 73 to gene pairs in the progenitor genomes requiring both genes have corresponding  
 74 genes in CS, while non-conserved ones mean the gene pairs that have no  
 75 corresponding genes in CS. **(B)** The  $K_a$ ,  $K_s$ , and  $K_d/K_s$  analyses of recent duplicates in  
 76 three subgenomes of CS. Conserved gene pairs refer to gene pairs that have  
 77 corresponding genes with the progenitor genomes of CS, while non-conserved ones  
 78 mean those that are not corresponding with the progenitor genome of CS. ns (not  
 79 significant)  $P > 0.05$ ,  $*P < 0.05$ ,  $** P < 0.01$  in Wilcoxon test.

80

81

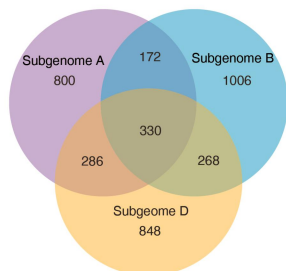

ArinaLrFor

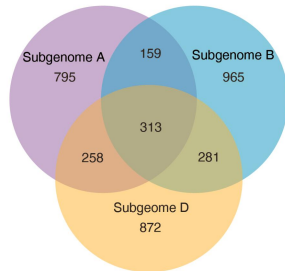

PI190962 (spelt wheat)

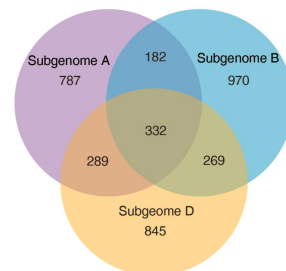

Julius

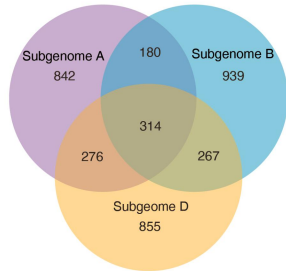

LongReach Lancer

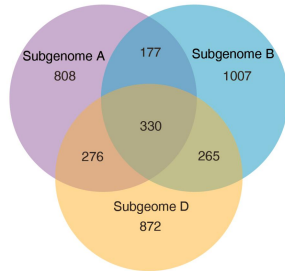

CDC Landmark

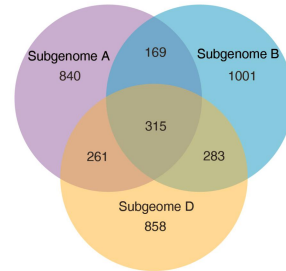

Mace

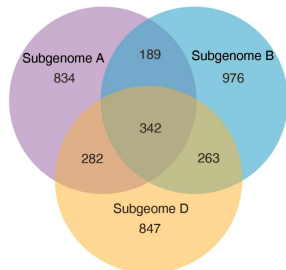

Norin 61

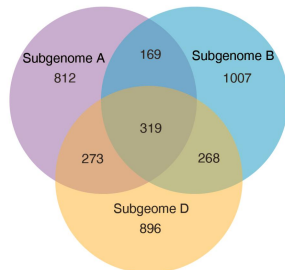

CDC Stanley

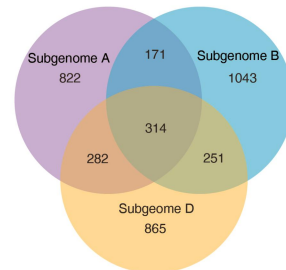

SY Mattis

82

83 **Supplementary Figure 7. Venn diagram shows the commonly retained recent**  
 84 **gene duplicates for the three subgenomes of the nine wheat genomes.**

85

86

87

88



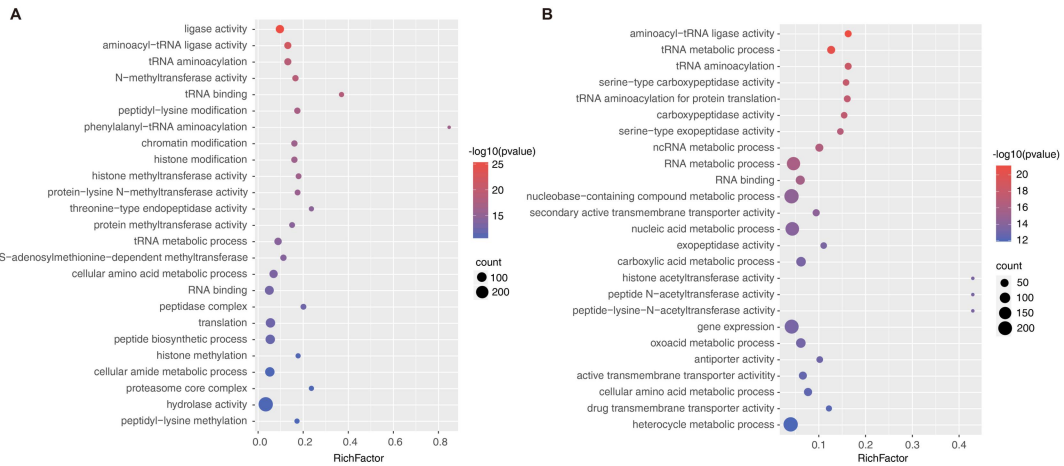

89  
90  
91  
92  
93  
94

**Supplementary Figure 8. Significantly enriched GO terms for well retained genes in the three subgenomes of (A) CS and (B) JAG.** The results are sorted according to the significance, of which GO term of ligase activity is the most significant.

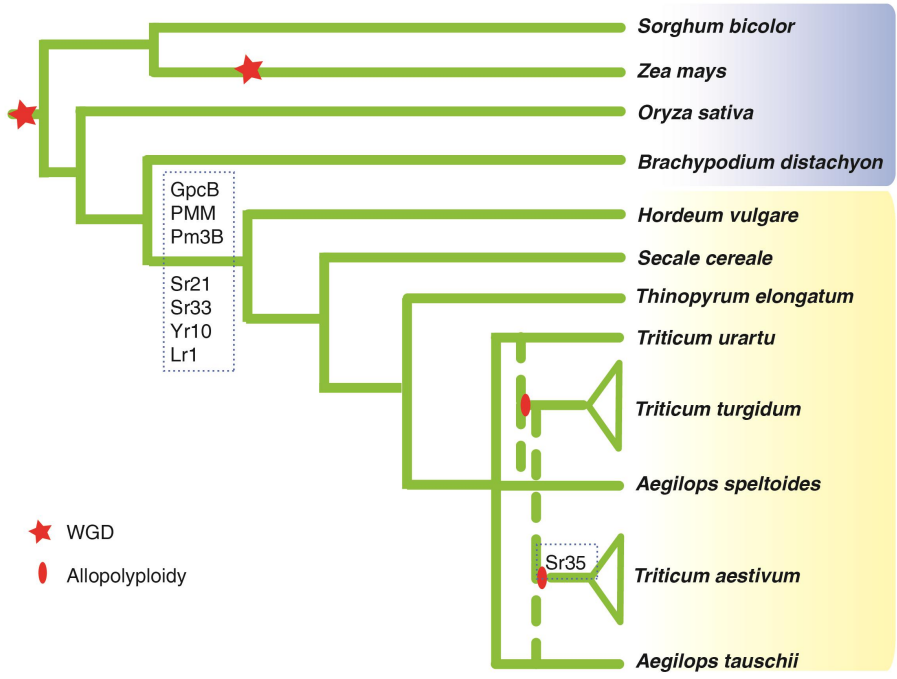

95  
96  
97  
98

**Supplementary Figure 9. Duplication timing of the eight previously identified agronomically important genes in the RBGD.**

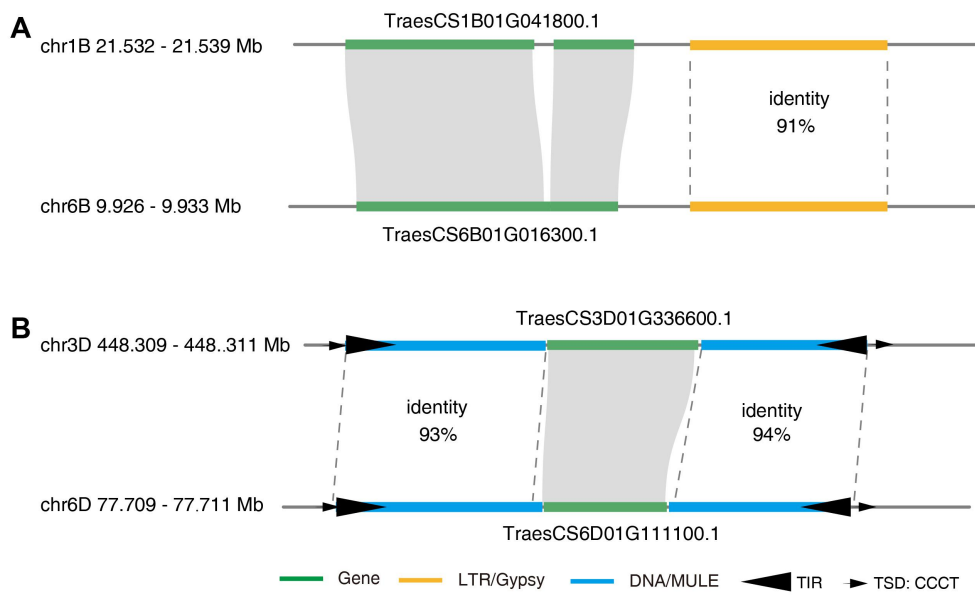

99

100 **Supplementary Figure 10. Two examples of gene duplication potentially derived**  
 101 **from TE activity in CS genome.** Identity of gene pairs is greater than 90%. **(A)** The  
 102 genes of *TraesCS1B01G041800.1* and *TraesCS6B01G016300.1* locate beside TEs of  
 103 the same subtype and with 91% sequence identity; the duplicated copy  
 104 (*TraesCS6B01G016300.1*) exhibits intron-less. **(B)** *TraesCS3D01G336600.1* and  
 105 *TraesCS6D01G111100.1* locate within TEs of the same subtype (DNA/MULE) and  
 106 with 94% sequence identity. TIR: terminal inverted repeat, TSD: target site  
 107 duplication.  
 108

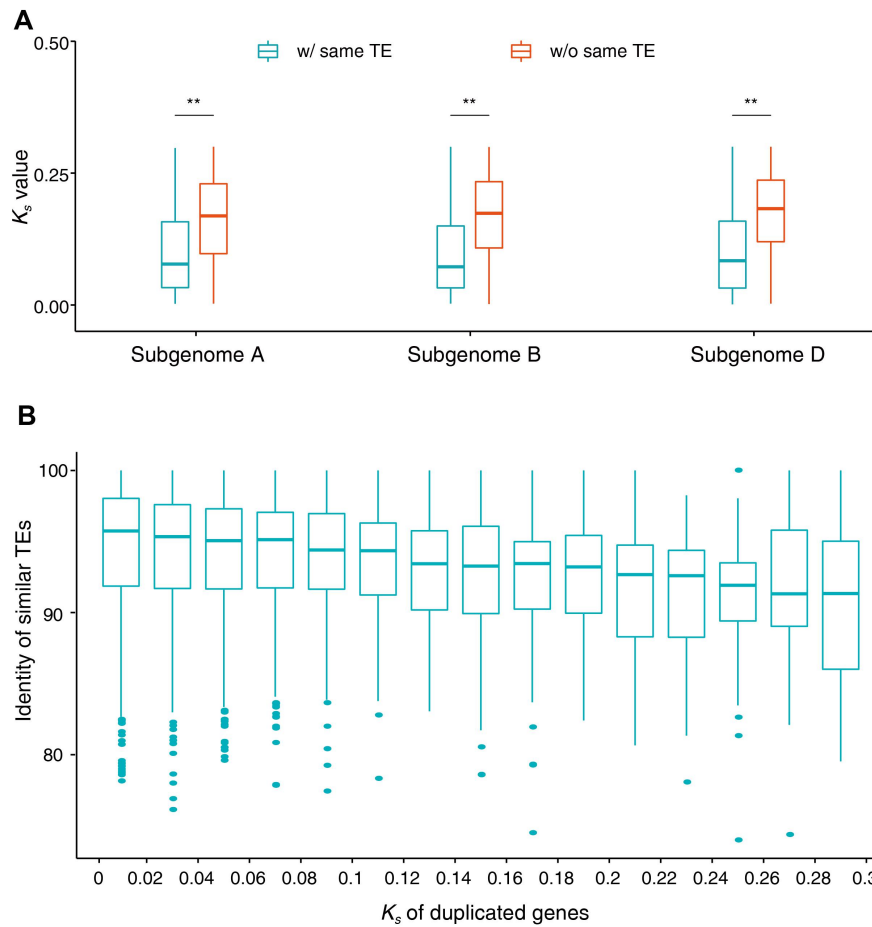

110

111 **Supplementary Figure 11. Evolutionary rate of recent duplicate gene pairs in CS.**112 **(A)**  $K_s$  of duplicates that are either flanked or not flanked by a given TE type. \*\*  $P <$ 113 0.01 in Wilcoxon test. **(B)** Sequence identity of similar TEs during the evolution114 process. The abscissa are  $K_s$  values in each 0.02 window of recently duplicated genes

115 with the same subtype of TE.
